# Supplementary material for: Alphaviruses Detected in Mosquitoes in the North-Eastern Regions of South Africa, 2014 to 2018
Source: MDPI journal article supplement (doi:10.3390/v15020414), 2023-02-01
Supplement: s1 [file s1]

## Supplementary File

**Table S1:** Table with PCR assay, corresponding primers and probes, sequences data, amplicon sizes and genome position.

| PCR                          | Primer Name | Orientation / channel/ dye | Sequence (5' – 3')               | Target gene | Fragment size (nt) | Genome position |
|------------------------------|-------------|----------------------------|----------------------------------|-------------|--------------------|-----------------|
| <i>Alpha</i> First           | Alpha+1     | Sense                      | GAYGCTTAYYTTGA<br>YATGGTTGATGG   | nsP4        | 481                | 6137-6618       |
|                              | Alpha-1     | Antisense                  | KYTCYTCIGTRTGYT<br>TTGTTCCCTGG   |             |                    |                 |
| <i>Alpha</i> Nested          | Alpha +2    | Sense                      | GIAAYTGYYAAYGTI<br>ACICARAT      |             | 198                | 6315-6513       |
|                              | Alpha -2    | Antisense                  | GCRAAIARIGCIGCIG<br>CYYTIGGICC   |             |                    |                 |
| <i>Alpha</i> Nested Specific | MNF         | Sense                      | GCAGCCTTTTGTCC<br>GTCYAA         |             | 347                | 6285-6632       |
|                              | MNR         | Antisense                  | GGCTTCAAGTCRTA<br>GGTTT          |             |                    |                 |
|                              | SNF         | Sense                      | GCAACCTTYTGCCC<br>CGCYAA         |             | 347                | 6285-6632       |
|                              | SNR         | Antisense                  | GGGACCAAATTATR<br>CGTCT          |             |                    |                 |
|                              | MINV Probe  | 560                        | GCTTTAAGAAGTAC<br>GCATGCAACA-VIC |             |                    | 6482-6504       |
|                              | SINV Probe  | 530                        | ATGACGAGTATTGG<br>GAGGAGTTTG-FAM |             |                    |                 |
| MIDV E1                      | MID104 75   | Sense                      | GGTGCACGTTCCAT<br>ATACCC         | E           | 350                | 6503-6525       |
|                              | MID110 45   | Antisense                  | TCCCAATAGCAATC<br>ACCACA         |             |                    |                 |
|                              | MID105 43   | Sense                      | TGAACCACAAGGCT<br>CCTTTC         |             |                    |                 |
|                              | MID109 11   | Antisense                  | CACTTTGCTGTGCA<br>AGTGGT         |             |                    |                 |
|                              | SIN910 6EF  | Sense                      | ATCAAGATYAGCAC<br>CTCAGGACC      |             | 616                | 9106-9722       |
|                              | SIN970 0ER  | Antisense                  | TCTAATTGGAGGCT<br>GATGTGTTT      |             |                    |                 |
| SINV E2                      | SINV A1     | Sense                      | AAAGGATACTTTCT<br>CCTCGC3        |             | 526                | 9148-9674       |
|                              | SINV A2     | Antisense                  | TGGGCAACAGGGA<br>CCATGCA         |             |                    |                 |
| NUDV E1                      | ND 124 F    | Sense                      | CACCCTAAAAGTGA<br>CGTT           |             |                    | 124-141         |
|                              | ND 632 R    | Antisense                  | ATTGCAGATGGGAT<br>ACCG           |             |                    |                 |

**Table S2:** *Culicidae* specie, vector surveillance site, identification number of *Culicidae* homogenate pool that tested positive for alphaviruses, pool size and accession numbers.

| <i>Culicidae</i> Species | Site    | Pool ID    | Pool Size | Virus | Accession Number                       | COI Accession Number |
|--------------------------|---------|------------|-----------|-------|----------------------------------------|----------------------|
| <i>Cx. terzii</i>        | Kyalami | KYA18MP050 | 1         | MIDV  | MT553110 (Ns4)                         | NA                   |
| <i>Cx. univittatus</i>   | Benoni  | BEN18MP028 | 20        | MIDV  | MT553109 (Ns4)                         | MW520835             |
| <i>Ae. dentatus</i> gr   | Benoni  | BEN17MP026 | 36        | MIDV  | MT553113 (Ns4),<br>MZ508482 (E1)       | MW538030             |
| <i>An. coustani</i>      | Mnisi   | KRU16MP021 | 9         | MIDV  | MT553112 (Ns4)                         | MW532836             |
| <i>Ae. durbanensis</i>   | Jozini  | KZN18MP346 | 46        | MIDV  | NA < 200 bp<br>(Ns4), MZ508481<br>(E1) | MW538028             |

|                              |          |                    |    |      |                                  |          |
|------------------------------|----------|--------------------|----|------|----------------------------------|----------|
| <i>Ae. durbanensis</i>       | Jozini   | KZN18MP342         | 50 | MIDV | MT553111 (Ns4),<br>MZ508483 (E1) | MT877605 |
| <i>Cx. univittatus</i>       | Marakele | <u>MAR14MP222*</u> | 51 | SINV | MZ508493 (Ns4)<br>/ OL802949     | MW520827 |
| <i>Cx. univittatus</i>       | Boschkop | GAU14MP063         | 51 | SINV | MZ508489 (Ns4)                   | MW520833 |
| <i>Cx. univittatus</i>       | Boschkop | <u>GAU14MP070*</u> | 50 | SINV | MZ508486 (Ns4)<br>/ OL802945     | MW520832 |
| <i>Cx. pipiens</i> s.l.      | Boschkop | GAU14MP018         | 31 | SINV | MZ508487 (Ns4)                   | MW520834 |
| <i>Cx. univittatus</i>       | Kyalami  | <u>KYA14MP134*</u> | 55 | SINV | MZ508492 (Ns4)<br>/ OL802947     | NA       |
| <i>Cx. pipiens</i> s.l.      | Kyalami  | <u>KYA14MP133*</u> | 47 | SINV | MZ508491 (Ns4)<br>/ OL802946     | MW520830 |
| <i>Cx. zombaensis</i>        | Kyalami  | KYA18MP048         | 4  | SINV | MZ508490 (Ns4)                   | MW520829 |
| <i>Cx. theileri</i>          | Kyalami  | KYA18MP054         | 16 | SINV | MZ508487 (Ns4)                   | MW520828 |
| <i>Cx. annulioris</i>        | KNP      | KNP17MP723         | 40 | SINV | MZ508484 (Ns4)                   | MW520831 |
| <i>Ae. tarsalis/aerarius</i> | KNP      | KNP17MP727         | 50 | SINV | NA < 200 bp                      | MW538033 |
| <i>Cx. univittatus</i>       | Benoni   | BEN17MP011         | 50 | SINV | MZ508485 (Ns4)                   | MW520836 |
| <i>Ma. uniformis</i>         | Mnisi    | KRU17MP427         | 50 | SINV | MZ508494 (Ns4)                   | NA       |
| <i>Ae. durbanensis</i>       | Jozini   | KZN18MP345         | 50 | SINV | NA < 200 bp                      | MW538029 |
| <i>Cx. annulioris</i>        | Lapalala | LAP18MP234         | 3  | NUDV | NA < 200 bp                      | NA       |
| <i>Ae. mcintoshi</i>         | Jozini   | KZN18MP347         | 18 | NUDV | NA < 200 bp                      | MW538032 |

NA: Not available due to sequence smaller than 200bp. These sequences are available upon request. KNP: Kruger National Park

\* Positive pools and detected the virus on cell culture.

**Table S3:** Pairwise – distance analysis of the SINV full genomes identified with the strains most similar to them (Kenya BONI 2013 strains). The P-distance was calculated using MEGA 7. The numbers in columns indicate the percentage (%) nucleotide

| Complete genomes identified in the study and closely related<br>Kenya BONI strains | Percentage (%) nucleotide similarity |      |      |      |      |
|------------------------------------------------------------------------------------|--------------------------------------|------|------|------|------|
| MAR14MP222_S2_L001_R1_001_(Reads)_U38305.1<br>_consensus                           |                                      |      |      |      |      |
| GAU14MP070_S4_L001_R1_001_(Reads)_U38305.1<br>_consensus                           | 100                                  |      |      |      |      |
| KYA14MP133_S1_L001_R1_001_(Reads)_U38305.1<br>_consensus                           | 99,9                                 | 99,9 |      |      |      |
| KYA14MP134_S3_L001_R1_001_(Reads)_U38305.1<br>_consensus                           | 99,9                                 | 99,9 | 99,9 |      |      |
| KY616987.1_Sindbis_virus_isolate_BONI_566_KENYA<br>_2013_complete_genome           | 98,3                                 | 98,3 | 98,3 | 98,3 |      |
| KY616985.1_Sindbis_virus_isolate_BONI_584_KENYA<br>_2013_complete_genome           | 98                                   | 98   | 98   | 98   | 98,9 |

similarity.

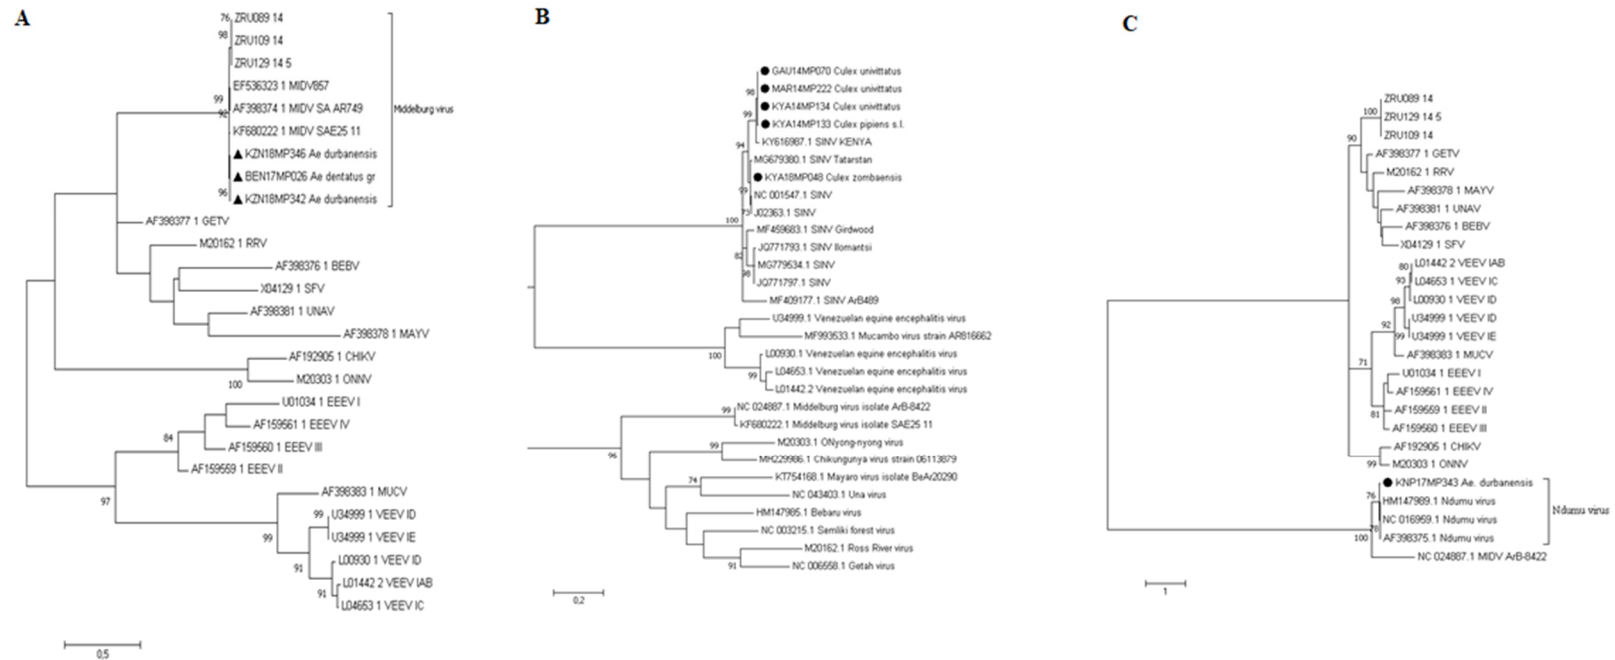

**Figure S1:** Phylogenetic of the E gene alphavirus-positive sequences identified in this study. **(A)** Phylogenetic tree of the positive sequences based on the 27 sequences and 344 bp of the glycoprotein E1 gene comparing Middelburg virus positive pools to other alphaviruses. The tree was constructed by employing the program MEGA 7, using the maximum likelihood method based on the Kimura 2-parameter model with 1000 bootstrap replicates. The tree with the highest log likelihood (−4642.43) is shown. Numbers on internal branches indicate bootstrap values. The samples that are part of this study are marked with a triangle shape. **(B)** Phylogenetic tree of the positive sequences based on the 29 sequences and 445 bp of the glycoprotein E2 gene of Sindbis positive specimens relative to other alphaviruses. The tree was constructed by employing the program MEGA 7, using the maximum likelihood method based on the Tamura 3- parameter model with 1000 bootstrap replicates. The tree with the highest log likelihood (−6218.03) is shown. Numbers on internal branches indicate bootstrap values. Samples that are part of this study are marked with a dot shape. **(C)** Phylogenetic tree of the positive sequences based on the 26 sequences and 386 bp of the glycoprotein E1 gene of NDUV positive specimens relative to other alphaviruses. The tree was constructed by employing the program MEGA 7, using the maximum likelihood method based on the Kimura-2 parameter model with 1000 bootstrap replicates. The tree with the highest log likelihood (−6222.32) is shown. Numbers on internal branches indicate bootstrap values. Samples which are part of this study are marked with a dot shape.

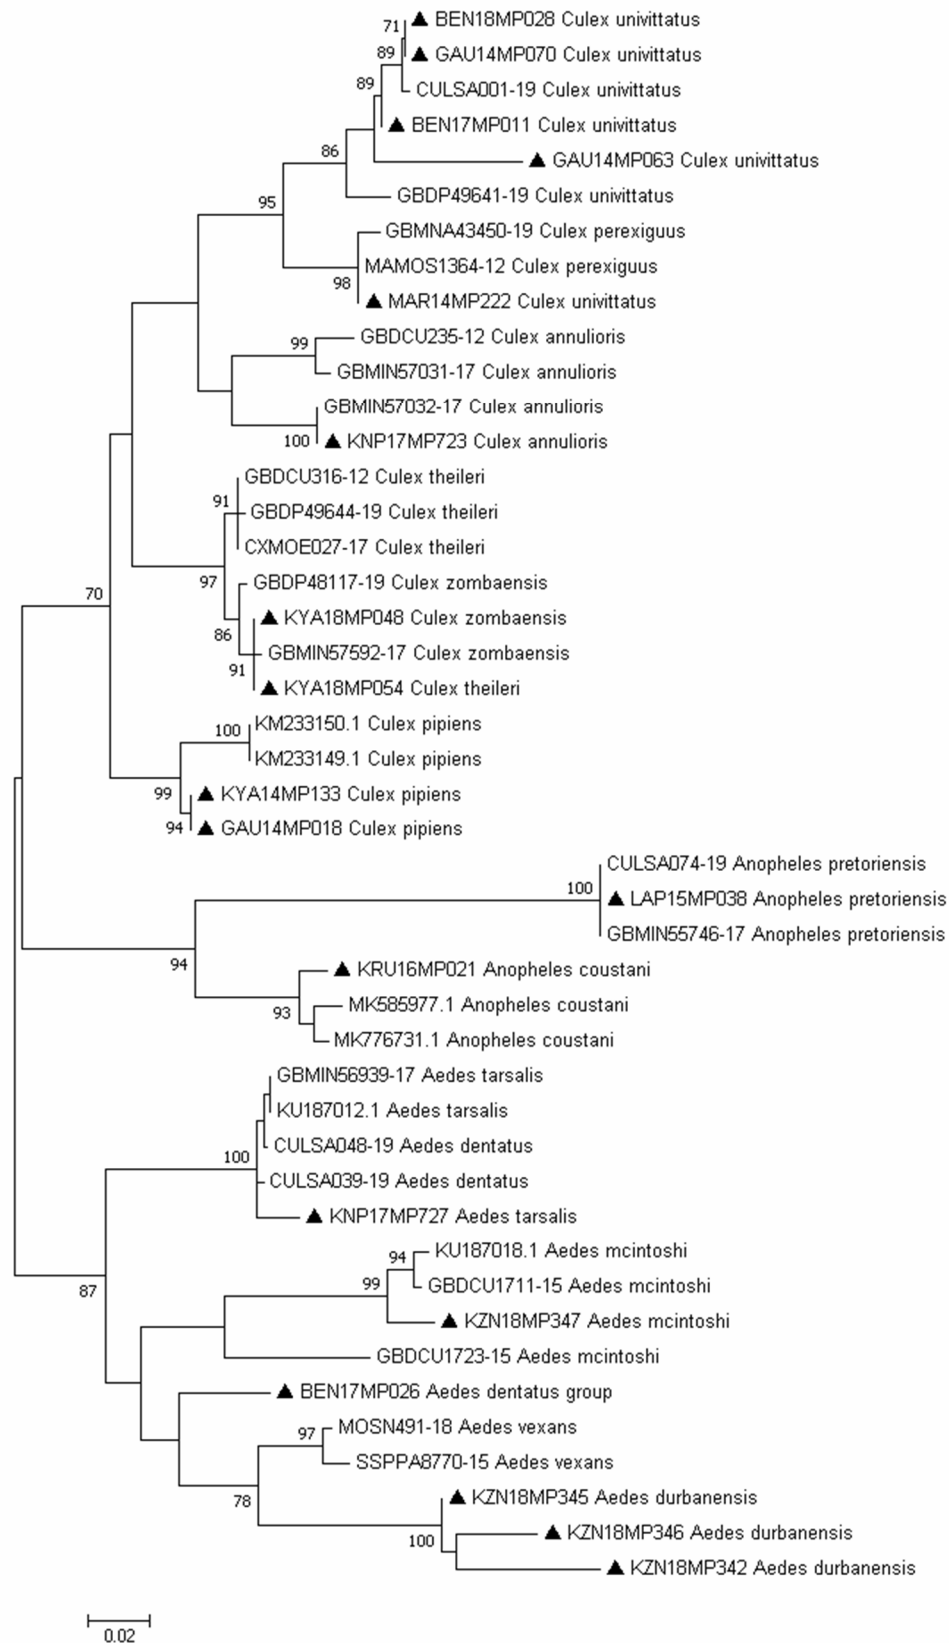

**Figure S2:** Phylogenetic tree of the mosquito pool positive sequences of the COI gene. The tree was constructed based on 45 sequences and 517 bp by employing the program MEGA 7, using the maximum likelihood method based on the General Time Reversible model with 1000 bootstrap replicates. GenBank accession numbers are indicated. Numbers on internal branches indicate bootstrap values. Samples which are part of this study are marked with a triangle.
